# Supplementary material for: Social and Clinical Determinants of COVID-19 Outcomes: Modeling Real-World Data from a Pandemic Epicenter
Source: PubMed Central journal article supplement — medRxiv. 2021 Apr 7:2021.04.06.21254728. Preprint. [Version 1] doi: 10.1101/2021.04.06.21254728 (PMC8043490; doi:10.1101/2021.04.06.21254728), 2021-04-07
Supplement: NIHPP2021.04.06.21254728-supplement-2.pdf [file NIHPP2021.04.06.21254728-supplement-2.pdf]

331 **TABLES**

332 **Supplemental Table 1. Descriptive statistics of demographic, clinical, and socioeconomic factors of confirmed**  
333 **COVID-19 patients.** Analysis of electronic health record data from New York-Presbyterian from March 1, 2020 to  
334 August 20, 2020.

335

336

337

338

339

340

341

342

343

344

345

346

347

348

349

350

351

352

353

|                                                                                    | Confirmed COVID-19 patients | Confirmed COVID-19 patients admitted to hospital | Severe disease (i.e., Vasopressor, intubation, ARDS, or renal dialysis) among hospitalized confirmed COVID-19 patients | Deaths among confirmed COVID-19 patients |
|------------------------------------------------------------------------------------|-----------------------------|--------------------------------------------------|------------------------------------------------------------------------------------------------------------------------|------------------------------------------|
|                                                                                    | n=11,930                    | n=4,895                                          | n=1,070                                                                                                                | n=1,654                                  |
|                                                                                    | n (%)                       | n (%)                                            | n (%)                                                                                                                  | n (%)                                    |
| <b>Age mean, years</b>                                                             | 57.26                       | 62.48                                            | 64.03                                                                                                                  | 74.58                                    |
| <b>Age Group, years</b>                                                            |                             |                                                  |                                                                                                                        |                                          |
| <30                                                                                | 1097 (9.20)                 | 236 (4.82)                                       | 20 (1.87)                                                                                                              | 9 (0.54)                                 |
| 30-39                                                                              | 1630 (13.66)                | 473 (9.66)                                       | 57 (5.33)                                                                                                              | 27 (1.63)                                |
| 40-49                                                                              | 1549 (12.98)                | 511 (10.44)                                      | 99 (9.25)                                                                                                              | 57 (3.45)                                |
| 50-59                                                                              | 1973 (16.54)                | 816 (16.67)                                      | 201 (18.79)                                                                                                            | 155 (9.37)                               |
| 60-69                                                                              | 2219 (18.60)                | 1026 (20.96)                                     | 296 (27.66)                                                                                                            | 302 (18.26)                              |
| 70-79                                                                              | 1769 (14.83)                | 891 (18.20)                                      | 255 (23.83)                                                                                                            | 460 (27.81)                              |
| 80+                                                                                | 1663 (13.94)                | 933 (19.06)                                      | 140 (13.08)                                                                                                            | 643 (38.88)                              |
| Unknown (missing)                                                                  | 30 (0.25)                   | 9 (0.18)                                         | 2 (0.19)                                                                                                               | 1 (0.06)                                 |
| <b>Sex</b>                                                                         |                             |                                                  |                                                                                                                        |                                          |
| Female                                                                             | 6051 (50.72)                | 2135 (43.62)                                     | 359 (33.55)                                                                                                            | 686 (41.48)                              |
| Male                                                                               | 5845 (48.99)                | 2750 (56.18)                                     | 708 (66.17)                                                                                                            | 967 (58.46)                              |
| Unknown (missing)                                                                  | 34 (0.28)                   | 10 (0.20)                                        | 3 (0.28)                                                                                                               | 1 (0.06)                                 |
| <b>Race/Ethnicity</b>                                                              |                             |                                                  |                                                                                                                        |                                          |
| Non-Hispanic White                                                                 | 3004 (25.18)                | 1099 (22.45)                                     | 214 (20.00)                                                                                                            | 408 (24.67)                              |
| Hispanic or Latino or Spanish Origin                                               | 3459 (28.99)                | 1514 (30.93)                                     | 315 (29.44)                                                                                                            | 496 (29.99)                              |
| Non-Hispanic American Indian/Alaskan Native/Native Hawaiian/Other Pacific Islander | 33 (0.28)                   | 22 (0.45)                                        | 4 (0.37)                                                                                                               | 4 (0.24)                                 |
| Non-Hispanic Asian                                                                 | 1143 (9.58)                 | 748 (15.28)                                      | 192 (17.94)                                                                                                            | 221 (13.36)                              |
| Non-Hispanic Black                                                                 | 1788 (14.99)                | 520 (10.62)                                      | 113 (10.56)                                                                                                            | 229 (13.85)                              |
| Non-Hispanic Other                                                                 | 1089 (9.13)                 | 507 (10.36)                                      | 103 (9.63)                                                                                                             | 144 (8.71)                               |
| Unknown (or missing)                                                               | 1414 (11.85)                | 485 (9.91)                                       | 129 (12.06)                                                                                                            | 152 (9.19)                               |
| <b>Comorbidities</b>                                                               |                             |                                                  |                                                                                                                        |                                          |
| Type 2 Diabetes (ICD10: E11)                                                       | 2662 (22.31)                | 1467 (29.97)                                     | 464 (43.36)                                                                                                            | 563 (34.04)                              |
| Type 1 Diabetes (ICD10: E10)                                                       | 142 (1.19)                  | 78 (1.59)                                        | 30 (2.80)                                                                                                              | 26 (1.57)                                |
| Hypertension (ICD10: I10)                                                          | 4492 (37.65)                | 2308 (47.15)                                     | 648 (60.56)                                                                                                            | 838 (50.67)                              |
| Heart Failure (ICD10: I50)                                                         | 994 (8.33)                  | 599 (12.24)                                      | 202 (18.88)                                                                                                            | 276 (16.69)                              |
| Cardiovascular Disease (ICD10: I25)                                                | 1321 (11.07)                | 788 (16.10)                                      | 259 (24.21)                                                                                                            | 320 (19.35)                              |
| Cancer (ICD10: C80)                                                                | 211 (1.77)                  | 71 (1.45)                                        | 22 (2.06)                                                                                                              | 44 (2.66)                                |
| Chronic Obstructive Pulmonary Disease (ICD10: J44)                                 | 536 (4.49)                  | 324 (6.62)                                       | 90 (8.41)                                                                                                              | 131 (7.92)                               |
| Asthma (ICD10: J45)                                                                | 1130 (9.47)                 | 439 (8.97)                                       | 120 (11.21)                                                                                                            | 111 (6.71)                               |
| Depression (ICD10: F32)                                                            | 1107 (9.28)                 | 480 (9.81)                                       | 117 (10.93)                                                                                                            | 131 (7.92)                               |
| <b>Body Mass Index (BMI)</b>                                                       |                             |                                                  |                                                                                                                        |                                          |
| <30 (Non-obese)                                                                    | 4918 (41.22)                | 2806 (57.33)                                     | 605 (56.54)                                                                                                            | 828 (50.06)                              |
| 30+ (Obese)                                                                        | 2403 (20.14)                | 1333 (27.23)                                     | 312 (29.16)                                                                                                            | 330 (19.95)                              |
| Unknown (missing)                                                                  | 4609 (38.63)                | 756 (15.44)                                      | 153 (14.30)                                                                                                            | 496 (29.99)                              |
| <b>Smoking Status</b>                                                              |                             |                                                  |                                                                                                                        |                                          |
| Never                                                                              | 1407 (33.67)                | 873 (17.83)                                      | 226 (21.12)                                                                                                            | 303 (18.32)                              |
| Unknown (missing)                                                                  | 6277 (52.62)                | 3530 (72.11)                                     | 687 (64.21)                                                                                                            | 1140 (68.92)                             |
| Passive                                                                            | 15 (0.13)                   | 7 (0.14)                                         | 1 (0.09)                                                                                                               | 3 (0.18)                                 |
| Quit                                                                               | 1382 (11.58)                | 431 (8.80)                                       | 143 (13.36)                                                                                                            | 187 (11.31)                              |
| Yes (current)                                                                      | 239 (2.00)                  | 54 (1.10)                                        | 13 (1.21)                                                                                                              | 21 (1.27)                                |
| <b>Hospital Site</b>                                                               |                             |                                                  |                                                                                                                        |                                          |
| Site 1                                                                             | 2432 (20.39)                | 1706 (34.85)                                     | 516 (48.50)                                                                                                            | 266 (16.08)                              |
| Site 2                                                                             | 549 (4.60)                  | 443 (9.05)                                       | 81 (7.57)                                                                                                              | 99 (5.99)                                |
| Site 3                                                                             | 3164 (26.52)                | 2614 (53.4)                                      | 424 (39.63)                                                                                                            | 668 (40.39)                              |
| Unknown (missing)                                                                  | 5785 (48.49)                | 132 (2.70)                                       | 46 (4.30)                                                                                                              | 621 (37.55)                              |
| <b>Insurance Type</b>                                                              |                             |                                                  |                                                                                                                        |                                          |
| Commercial                                                                         | 2871 (24.07)                | 1230 (25.13)                                     | 324 (30.28)                                                                                                            | 217 (13.12)                              |
| Hybrid                                                                             | 247 (2.07)                  | 131 (2.68)                                       | 37 (3.46)                                                                                                              | 39 (2.36)                                |
| Medicaid                                                                           | 220 (1.84)                  | 156 (3.19)                                       | 43 (4.02)                                                                                                              | 21 (1.27)                                |
| Medicare                                                                           | 404 (3.39)                  | 314 (6.41)                                       | 102 (9.53)                                                                                                             | 92 (5.56)                                |
| Unknown (missing)                                                                  | 8188 (68.63)                | 3064 (62.59)                                     | 564 (52.71)                                                                                                            | 1285 (77.69)                             |
| <b>Neighborhood Deprivation Index (NDI)</b>                                        |                             |                                                  |                                                                                                                        |                                          |
| [-2.07,-0.696]                                                                     | 1788 (14.99)                | 624 (15.73)                                      | 145 (13.55)                                                                                                            | 217 (13.12)                              |
| [-0.696,0.544]                                                                     | 1791 (15.01)                | 770 (14.65)                                      | 188 (17.57)                                                                                                            | 278 (16.81)                              |
| [0.544,3.09]                                                                       | 1783 (14.95)                | 717 (12.75)                                      | 191 (17.85)                                                                                                            | 260 (15.72)                              |
| Unknown (missing)                                                                  | 6568 (55.05)                | 2784 (56.87)                                     | 546 (51.03)                                                                                                            | 899 (54.35)                              |

391

392
